# Supplementary material for: SNRFCB: sub-network based random forest classifier for predicting chemotherapy benefit on survival for cancer treatment
Source: Royal Society of Chemistry journal article supplement (doi:10.1039/c5mb00399g), 2016-02-01
Supplement: c5mb00399g1.xlsx [file c5mb00399g1.xlsx]

## Sheet: lung cancer-1
1. 551 gene expression signatures of lung cancer derived from RWR. the localp and globalp value is less than 0.05.
genes	localp	globalp
AATK	0.02	0.0452081
ABCF3	0.037	0.0374568
ABL1	0.017	0.001712
ABL2	0.025	0.0255368
ACVR1B	0.017	0.0257113
ACVR1C	0.008	0.017535
ACVR2B	0.02	0.0200714
ACVRL1	0.021	0.0366427
ADAM2	0.019	0.0312837
ADAMTS2	0.026	0.0451732
ADRBK2	0.019	0.0202595
AGTR2	0.022	0.0310036
AKAP6	0.03	0.039188
AKT1	0.009	0.00270211
AKT3	0.019	0.0384993
ALDH1A1	0.022	0.0482036
ALK	0.004	0.0054359
ANK1	0.008	0.0153532
ANKHD1	0.031	0.0439195
APAF1	0.028	0.028063
APBB1IP	0.012	0.0155525
APC	0.002	0.00137922
ARAF	0.023	0.0285842
ARFGEF1	0.044	0.0472312
ARHGAP29	0.017	0.016182
ARHGAP6	0.017	0.0402461
ARHGAP9	0.024	0.0387419
ARHGEF11	0.028	0.0267505
ARID4A	0.021	0.0387531
ASH2L	0.029	0.0297598
ATM	0.001	0.000613662
ATR	0.002	0.00381243
AURKA	0.013	0.0124906
AURKB	0.032	0.0275855
AURKC	0.008	0.00987406
AXL	0.024	0.0262656
BAI3	0.008	0.0109813
BAP1	0.032	0.0141386
BARD1	0.01	0.0118738
BAX	0.042	0.0321468
BAZ1A	0.011	0.0170082
BCL3	0.02	0.0252071
BCL6	0.026	0.00302014
BIRC6	0.025	0.0337025
BMPR1A	0.047	0.0301785
BMPR1B	0.009	0.00563736
BMX	0.008	0.0104385
BNIP3	0.048	0.0473046
BRAF	0.001	0.0012847
BRCA1	0.016	0.00362286
BRCA2	0.004	0.00764066
BRCC3	0.023	0.0296473
BRE	0.04	0.0284825
BTK	0.011	0.00619625
BUB1	0.027	0.0350974
CAD	0.035	0.0317262
CALCR	0.034	0.0348385
CAMK4	0.009	0.0142107
CAMKK2	0.016	0.0323994
CAMKV	0.016	0.0222994
CARD6	0.034	0.0412289
CASK	0.019	0.0132607
CASP3	0.02	0.00765862
CASP4	0.038	0.0261498
CASP5	0.025	0.0303379
CBLB	0.006	0.0122044
CCNB3	0.012	0.0234619
CCNE1	0.018	0.0210432
CCNG1	0.023	0.0288842
CCNT1	0.034	0.0291819
CCNT2	0.029	0.0424419
CDC25A	0.007	0.0128838
CDC27	0.018	0.0134465
CDC42BPA	0	0.00445873
CDC42BPB	0.033	0.0453059
CDC42BPG	0.009	0.0216006
CDC5L	0.023	0.0129152
CDH11	0.004	0.00347131
CDH4	0.009	0.0184618
CDK5	0.011	0.00798481
CDK5RAP2	0.035	0.0266854
CDK7	0.034	0.0262311
CDK8	0.026	0.0247067
CDK9	0.039	0.0140321
CDKN2A	0	0.000129329
CDKN2B	0.008	0.0100764
CDKN2C	0.019	0.0330084
CEP152	0.022	0.0200275
CHD1	0.008	0.0197078
CHD1L	0.015	0.0189372
CHD6	0.037	0.0460896
CHEK1	0.019	0.0257763
CHFR	0.006	0.00932419
CHUK	0.006	0.00596025
CLDN1	0.039	0.0371636
CLSPN	0.029	0.0302133
COX4I1	0.047	0.0490205
CREBBP	0.014	0.00272094
CSF1R	0.005	0.0086936
CSK	0.017	0.0144855
CSNK1E	0.033	0.0298445
CTNNB1	0.001	0.000344154
CTNND2	0.021	0.0309906
CUL1	0.028	0.0126166
DAPK3	0.015	0.0333332
DCN	0.042	0.0314628
DCX	0.036	0.0440408
DDR1	0.032	0.0332185
DDR2	0.013	0.0176295
DDX23	0.046	0.0322355
DDX5	0.019	0.0246854
DGKB	0.006	0.0032663
DGKD	0.044	0.042944
DKK1	0.013	0.0123257
DKK2	0.031	0.0398359
DLC1	0.028	0.0372738
DMPK	0.02	0.0171651
DNAJB11	0.024	0.0365639
DNAJC6	0.041	0.0490115
DOCK1	0.031	0.0356817
DOCK3	0.002	0.0046522
DSG3	0.028	0.0446189
E2F3	0.016	0.0269768
EFNA1	0.026	0.0232601
EFNA4	0.039	0.0295805
EGFR	0	3.47e-07
EIF2AK2	0.035	0.0274989
EIF2AK4	0.033	0.0476712
EIF4G1	0.021	0.0238851
EP300	0.022	0.00321092
EPHA1	0.02	0.0396486
EPHA2	0.019	0.0237467
EPHA3	0.001	0.000777189
EPHA4	0.017	0.0181634
EPHA5	0.002	0.00137827
EPHA6	0.021	0.0314547
EPHA7	0.002	0.00343113
EPHA8	0.021	0.0260826
EPHB3	0.01	0.0135724
EPHB4	0.009	0.0181925
ERAS	0.007	0.0137073
ERBB2	0.001	0.00119998
ERBB2IP	0.013	0.0123366
ERBB3	0.003	0.00359917
ERBB4	0	0.00145751
ERC1	0.021	0.0371838
ERCC2	0.032	0.0311535
ERG	0.012	0.0144536
ESPL1	0.018	0.0430667
ETS1	0.026	0.0265604
ETS2	0.021	0.0252438
ETV1	0.018	0.0273937
F9	0.013	0.0187297
FAM123B	0.011	0.0166401
FAM46D	0.028	0.0225297
FBXL12	0.024	0.0427371
FBXO34	0.012	0.0206561
FBXW7	0.006	0.00532601
FER	0.01	0.0134629
FES	0.007	0.0103887
FGD2	0.017	0.0397772
FGF3	0.019	0.0268003
FGFR1	0.013	0.00835327
FGFR2	0.003	0.00328964
FGFR3	0.034	0.0237109
FGFR4	0	0.00241186
FH	0.014	0.0208321
FLT1	0.004	0.00498932
FLT4	0.002	0.00535769
FOS	0.034	0.0193348
FOXO3	0.012	0.0152982
FOXP1	0.022	0.0251667
FOXP2	0.028	0.0251667
FRK	0.009	0.0206316
FRMPD4	0.015	0.0316018
FYN	0.004	0.00100382
FZR1	0.032	0.0283526
GAB1	0.011	0.00880054
GAB2	0.014	0.0241073
GAK	0.011	0.0145473
GATA1	0.008	0.0120273
GATA2	0.02	0.0328725
GCK	0.027	0.0313271
GHR	0.022	0.0238938
GLI3	0.026	0.0261909
GLRA2	0.033	0.0474371
GNAS	0.021	0.00563736
GNB5	0.034	0.0267383
GOLGA5	0.025	0.0468647
GPC3	0.013	0.0160558
GRB14	0.02	0.0245457
GRB7	0.006	0.0118849
GRIN2B	0.035	0.0239549
GRK7	0.014	0.0213611
GSK3A	0.015	0.0120365
GSK3B	0.027	0.00467329
GUCY2F	0.018	0.00578361
HCK	0.003	0.00364604
HDAC7	0.024	0.0281044
HERC2	0.006	0.00991459
HK2	0.033	0.0439585
HMHA1	0.019	0.0402461
HNF4A	0.035	0.0270744
HRAS	0.004	0.00229806
HSPA14	0.045	0.0294501
HSPA4	0.034	0.0221082
HUS1	0.044	0.0318245
IGF1R	0.006	0.00525441
IKBKB	0.018	0.0144923
IKZF1	0.025	0.030142
IKZF3	0.029	0.0312002
IL16	0.047	0.0329183
IL3RA	0.021	0.0315291
IMPDH2	0.048	0.0434914
INHBA	0.006	0.00549336
INPP1	0.025	0.0486743
INSR	0.004	0.00202621
INSRR	0.003	0.00333695
IPO11	0.018	0.0185003
IRAK1	0.009	0.00565281
IRAK2	0.007	0.00907517
IRF1	0.025	0.0435026
IRS1	0.001	0.00336967
ITGA1	0.045	0.0349798
ITGA2B	0.033	0.0303975
ITGA4	0.03	0.025865
ITGA6	0.039	0.0306216
ITGA8	0.009	0.0155232
ITGA9	0.022	0.0267524
ITGB4	0.029	0.0269741
ITGB6	0.034	0.038454
ITK	0.002	0.00530475
ITPR2	0.039	0.0444686
JAG1	0.021	0.0271568
JAG2	0.006	0.00816726
JAK2	0.003	0.00246802
JAK3	0.001	0.00650864
JUNB	0.026	0.0327941
JUP	0.006	0.00437332
KCNC2	0.047	0.0400864
KCNV1	0.045	0.0354862
KDR	0.001	0.00147487
KEAP1	0.01	0.00390383
KIT	0.003	0.00410963
KLK10	0.008	0.0224204
KNTC1	0.038	0.0423197
KRAS	0	0.00043182
KREMEN1	0.02	0.0303978
KRIT1	0.026	0.0428018
KSR1	0.006	0.0170829
LATS1	0.003	0.00483586
LATS2	0.007	0.0143171
LCK	0.013	0.00644796
LMTK2	0.004	0.00470558
LOX	0.044	0.0329654
LRP1B	0	0.000892197
LRP6	0.019	0.00875714
LRRK1	0.008	0.0146039
LTF	0.048	0.0378155
LTK	0.002	0.00414712
LZTR1	0.004	0.0211348
MAD1L1	0.02	0.0168195
MAGEA1	0.038	0.0397637
MAML1	0.011	0.00790886
MAP2K4	0.004	0.008023
MAP2K5	0.025	0.030975
MAP3K10	0.015	0.0136555
MAP3K12	0.011	0.0152448
MAP3K2	0.007	0.0129274
MAP3K3	0.013	0.00541342
MAP3K4	0.005	0.00873917
MAP3K6	0.009	0.0229097
MAP3K9	0.025	0.0493948
MAP4K1	0.007	0.00840422
MAP4K3	0.004	0.0111091
MAP4K4	0.04	0.0373645
MAPK1	0.035	0.00822151
MAPK11	0.024	0.0324136
MAPK14	0.015	0.0082143
MAPK4	0.008	0.0168407
MAPK6	0.004	0.0104995
MAPK7	0.018	0.0267677
MAPK8	0.022	0.0127844
MAST1	0.007	0.014998
MAST2	0.011	0.00720042
MATK	0.02	0.0342074
MBD4	0.031	0.0482425
MCF2	0.024	0.0342201
MDM2	0.016	0.00802309
MED13L	0.045	0.0418465
MEF2C	0.03	0.0300207
MEFV	0.028	0.0375865
MEN1	0.031	0.0271943
MEPE	0.02	0.0427446
MERTK	0.004	0.00588282
MET	0.001	0.00302864
MINK1	0.036	0.0387617
MKNK1	0.005	0.018285
MKNK2	0.008	0.0200149
MLL	0.006	0.00806683
MLLT3	0.039	0.0412371
MMP2	0.035	0.0253155
MRAS	0.02	0.0281933
MRE11A	0.024	0.0262429
MSH4	0.035	0.0362181
MSH6	0.003	0.00386025
MST1R	0.022	0.03019
MSTN	0.023	0.0356153
MYB	0.023	0.0269813
MYBL2	0.015	0.0133447
MYCL1	0.016	0.0207836
MYCN	0.022	0.0349162
MYH11	0.033	0.0348764
MYH9	0.03	0.0239236
MYO3A	0.009	0.010985
N4BP2	0.032	0.0444382
NAT6	0.038	0.0483209
NCAPD3	0.023	0.044392
NCOA2	0.031	0.0256992
NCOA3	0.035	0.0259775
NEK1	0.017	0.0146662
NEK7	0.021	0.0361541
NEK9	0.02	0.0250586
NF1	0.002	0.00212846
NF2	0.028	0.0292825
NIPBL	0.032	0.0321746
NLK	0.026	0.0336934
NLRP1	0.007	0.00773396
NLRP3	0.01	0.0173087
NLRP4	0.005	0.0113315
NOS1AP	0.02	0.0281824
NOTCH1	0.011	0.00882606
NOTCH2	0.003	0.00536533
NOTCH3	0.005	0.00832957
NOTCH4	0.02	0.015724
NR0B1	0.04	0.0462025
NR1H4	0.027	0.0379096
NRAS	0.001	0.00159318
NRBP1	0.031	0.0429057
NTHL1	0.032	0.0322707
NTRK1	0.002	0.00204687
NTRK2	0.002	0.00236229
NTRK3	0.001	0.00105069
NUMA1	0.027	0.0321897
NUP153	0.021	0.014698
NUP160	0.045	0.0395966
NUP214	0.021	0.0277716
NUP54	0.048	0.0474362
NXF3	0.019	0.0405237
OCRL	0.025	0.0256126
OGG1	0.007	0.0183329
ORC6L	0.019	0.0305927
PAK3	0.001	0.00461991
PAK4	0.005	0.00764968
PAK6	0.005	0.0209088
PAK7	0.002	0.00649779
PAPPA2	0.027	0.0422024
PAXIP1	0.011	0.0161239
PC	0.049	0.0424816
PCNA	0.036	0.0173142
PDCD5	0.048	0.0454671
PDGFC	0.02	0.0323139
PDGFRA	0.002	0.00159005
PDGFRB	0.001	0.00244918
PDK1	0.033	0.0340238
PDK3	0.034	0.0476305
PDPK1	0.014	0.0162179
PGR	0.034	0.028289
PI4K2A	0.027	0.0442022
PI4KA	0.009	0.0163093
PIGC	0.042	0.0449337
PIK3C2A	0.014	0.0180452
PIK3C2B	0.016	0.0263185
PIK3C3	0.002	0.00284246
PIK3CA	0	0.000707664
PIK3CD	0.013	0.0102465
PIK3CG	0.001	0.00169239
PIK3R1	0.016	0.00274099
PIP5KL1	0.031	0.0426465
PKN3	0.014	0.0209949
PLCB1	0.03	0.039269
PLCG1	0.002	0.00129086
PLCG2	0.007	0.00818688
PLEKHB1	0.031	0.0473531
PLEKHO1	0.036	0.044868
PLXNB3	0.043	0.031506
PPARGC1A	0.007	0.0121228
PPFIA3	0.018	0.0260111
PPIL5	0.018	0.0326736
PPP1R10	0.037	0.045275
PPP1R15A	0.031	0.0327717
PPP1R3A	0.022	0.0451209
PPP2R1B	0.004	0.00369352
PREX1	0.008	0.0164931
PRKACA	0.035	0.004593
PRKACB	0.007	0.00911926
PRKCB	0.007	0.00443382
PRKCD	0.013	0.0082597
PRKCE	0.011	0.00532246
PRKCG	0.004	0.00532645
PRKCH	0.024	0.0352819
PRKCI	0.034	0.0253492
PRKCQ	0.021	0.0260793
PRKD1	0.01	0.0119521
PRKD2	0.037	0.03188
PRKD3	0.016	0.0173896
PRKDC	0.005	0.00408949
PRKG1	0.039	0.0321284
PRKX	0.022	0.045853
PRPF8	0.029	0.0258523
PTCH1	0.002	0.00393143
PTCH2	0.007	0.00925458
PTEN	0	0.000470445
PTPN11	0.001	0.00182519
PTPN9	0.019	0.041087
PTPRD	0.001	0.00180201
PTPRG	0.019	0.0213404
PTPRM	0.028	0.0355837
PTPRN	0.002	0.00244172
PTPRO	0.018	0.0250994
PTPRT	0.002	0.00409617
RAC1	0.038	0.00815728
RAD21	0.009	0.0127181
RAF1	0.005	0.00226135
RAG1	0.027	0.0433519
RALA	0.037	0.0248868
RALB	0.038	0.0426314
RAP2B	0.01	0.0158609
RAPGEF1	0.024	0.0262738
RARA	0.036	0.0251899
RASA3	0.018	0.0396443
RASGRP3	0.017	0.0321574
RASSF2	0.01	0.0149162
RB1	0	0.000156323
RBL1	0.003	0.003787
RBL2	0.011	0.0121534
RELA	0.023	0.0078856
REST	0.024	0.0384742
RET	0.008	0.00412334
RGS14	0.035	0.0494953
RGS3	0.038	0.0373349
RGS6	0.034	0.0411919
RHOB	0.034	0.0125236
RHOBTB3	0.037	0.0489583
RIF1	0.04	0.0101551
RIN1	0.025	0.0299562
RIPK1	0.031	0.0272345
RNF130	0.028	0.0394004
ROBO2	0.006	0.0062472
ROCK1	0.012	0.0131785
ROR2	0.003	0.00315493
ROS1	0.018	0.0354546
RPS6KA1	0.031	0.018777
RPS6KA2	0.016	0.0284711
RPS6KA6	0.003	0.00700807
RPS6KC1	0.018	0.0192567
RYK	0.01	0.0277759
SATB1	0.019	0.0283318
SCYL2	0.023	0.0447904
SEMA3F	0.043	0.0413005
SERPINB2	0.024	0.0439372
SGK2	0.007	0.0225718
SHC1	0.002	0.00199905
SHC3	0.022	0.0238157
SIAH2	0.048	0.0371303
SKI	0.014	0.0306676
SLK	0.027	0.0403817
SMAD4	0.003	0.0007712
SMARCA4	0.004	0.00297422
SMARCC1	0.026	0.0222876
SMARCC2	0.02	0.0253616
SMARCD3	0.022	0.0301128
SMC2	0.033	0.0297975
SMO	0.016	0.0241612
SNX19	0.023	0.0308654
SOCS1	0.024	0.0150385
SPEN	0.011	0.0150753
SPI1	0.019	0.0240865
SPTB	0.025	0.0259631
SRC	0.02	0.00223166
STAT2	0.015	0.0296647
STAT3	0.004	0.00358884
STAT5A	0.024	0.0139984
STAT5B	0.011	0.00821318
STAT6	0.018	0.028149
STK11	0	0.000144866
STK24	0.046	0.0318644
STK3	0.022	0.0188868
STK32C	0.023	0.0401093
STK36	0.005	0.00557686
STRADB	0.026	0.0296277
SYK	0.03	0.0124798
TAF1	0.024	0.0253901
TAF1L	0.004	0.00495443
TAF4B	0.026	0.0412056
TAOK3	0	0.0105989
TEC	0.002	0.003856
TEK	0.007	0.00988378
TFDP1	0.004	0.00606701
TGFBR2	0.037	0.025607
TGS1	0.039	0.0341256
TIAM1	0.024	0.0241759
TIMP3	0.027	0.0317904
TNFAIP3	0.022	0.0139074
TNFRSF9	0.028	0.0268091
TNK2	0.046	0.0248969
TNKS2	0.02	0.0329302
TOP1	0.04	0.0265015
TP53	0	1.08e-05
TP63	0.006	0.00397691
TP73	0.029	0.0248718
TPO	0.047	0.0318134
TRAIP	0.031	0.040529
TRIB1	0.024	0.0409396
TRIM24	0.03	0.0292606
TRIM33	0.027	0.0392038
TRIM36	0.031	0.0436007
TRPM6	0.009	0.0181138
TSC1	0.007	0.0120981
TSC2	0.005	0.00602925
TSC22D4	0.049	0.0247472
TSHR	0.003	0.00853138
TTBK1	0.011	0.013191
TTBK2	0.017	0.0334172
TWF2	0.024	0.0290307
TYK2	0.01	0.0124452
TYRO3	0.013	0.0152141
TYRP1	0.041	0.0308932
UBE2O	0.038	0.00806128
UBR1	0.035	0.0335646
UBR5	0.007	0.0058915
UNC5B	0.045	0.0430314
USP38	0.048	0.0391979
USP8	0.045	0.0295393
UVRAG	0.044	0.0408583
VAV1	0.007	0.00534051
VAV2	0.009	0.0129366
VAV3	0.012	0.0118728
VIPR2	0.039	0.0490655
WDR44	0.008	0.0212569
WNK1	0.023	0.0306216
WNK3	0.007	0.0231691
WT1	0.022	0.0294361
XIAP	0.014	0.0248801
XRCC1	0.024	0.026502
YES1	0.014	0.0140219
ZAK	0.013	0.0080539
ZAP70	0.025	0.0246591
ZFYVE9	0.011	0.00795
ZMYND10	0.004	0.00507352
ZNF521	0.018	0.0402043

## Sheet: lung cancer-2
2. the 510 genes signatures of lung cancer was used to build the model
1	AATK
2	ABCF3
3	ABL1
4	ABL2
5	ACVR1B
6	ACVR2B
7	ACVRL1
8	ADAM2
9	ADAMTS2
10	ADRBK2
11	AGTR2
12	AKAP6
13	AKT1
14	AKT3
15	ALDH1A1
16	ALK
17	ANK1
18	APAF1
19	APBB1IP
20	APC
21	ARAF
22	ARFGEF1
23	ARHGAP29
24	ARHGAP6
25	ARHGEF11
26	ARID4A
27	ASH2L
28	ATM
29	ATR
30	AURKA
31	AURKB
32	AURKC
33	AXL
34	BAI3
35	BAP1
36	BARD1
37	BAX
38	BAZ1A
39	BCL3
40	BCL6
41	BMPR1A
42	BMPR1B
43	BMX
44	BNIP3
45	BRCA1
46	BRCA2
47	BRCC3
48	BRE
49	BTK
50	BUB1
51	CAD
52	CALCR
53	CAMK4
54	CAMKK2
55	CAMKV
56	CASK
57	CASP3
58	CASP4
59	CASP5
60	CBLB
61	CCNE1
62	CCNG1
63	CCNT1
64	CCNT2
65	CDC25A
66	CDC27
67	CDC42BPA
68	CDC42BPB
69	CDC5L
70	CDH11
71	CDH4
72	CDK5
73	CDK5RAP2
74	CDK7
75	CDK8
76	CDK9
77	CDKN2A
78	CDKN2B
79	CDKN2C
80	CEP152
81	CHD1
82	CHD1L
83	CHEK1
84	CHFR
85	CHUK
86	CLDN1
87	CLSPN
88	COX4I1
89	CREBBP
90	CSF1R
91	CSK
92	CSNK1E
93	CTNNB1
94	CTNND2
95	CUL1
96	DAPK3
97	DCN
98	DCX
99	DDR1
100	DDR2
101	DDX23
102	DDX5
103	DGKB
104	DGKD
105	DKK1
106	DKK2
107	DLC1
108	DMPK
109	DNAJC6
110	DOCK1
111	DOCK3
112	DSG3
113	E2F3
114	EFNA1
115	EFNA4
116	EGFR
117	EIF2AK2
118	EIF4G1
119	EP300
120	EPHA1
121	EPHA2
122	EPHA3
123	EPHA4
124	EPHA5
125	EPHA7
126	EPHB3
127	EPHB4
128	ERBB2
129	ERBB2IP
130	ERBB3
131	ERBB4
132	ERC1
133	ERCC2
134	ERG
135	ESPL1
136	ETS1
137	ETS2
138	ETV1
139	F9
140	FBXL12
141	FBXO34
142	FBXW7
143	FER
144	FES
145	FGD2
146	FGF3
147	FGFR1
148	FGFR2
149	FGFR3
150	FGFR4
151	FH
152	FLT1
153	FLT4
154	FOS
155	FOXO3
156	FRK
157	FRMPD4
158	FYN
159	FZR1
160	GAB1
161	GAB2
162	GAK
163	GATA1
164	GATA2
165	GCK
166	GHR
167	GLI3
168	GLRA2
169	GNAS
170	GNB5
171	GOLGA5
172	GPC3
173	GRB14
174	GRB7
175	GRIN2B
176	GSK3A
177	GSK3B
178	GUCY2F
179	HCK
180	HDAC7
181	HERC2
182	HK2
183	HMHA1
184	HNF4A
185	HRAS
186	HSPA14
187	HSPA4
188	HUS1
189	IGF1R
190	IKBKB
191	IKZF1
192	IKZF3
193	IL16
194	IL3RA
195	IMPDH2
196	INHBA
197	INPP1
198	INSR
199	INSRR
200	IRAK1
201	IRF1
202	IRS1
203	ITGA2B
204	ITGA4
205	ITGA6
206	ITGA8
207	ITGA9
208	ITGB4
209	ITGB6
210	ITK
211	ITPR2
212	JAG1
213	JAG2
214	JAK2
215	JAK3
216	JUNB
217	JUP
218	KCNC2
219	KCNV1
220	KDR
221	KEAP1
222	KIT
223	KLK10
224	KNTC1
225	KRAS
226	KRIT1
227	KSR1
228	LATS1
229	LCK
230	LMTK2
231	LOX
232	LRP1B
233	LRP6
234	LRRK1
235	LTF
236	LTK
237	LZTR1
238	MAD1L1
239	MAGEA1
240	MAML1
241	MAP2K4
242	MAP2K5
243	MAP3K10
244	MAP3K12
245	MAP3K2
246	MAP3K3
247	MAP3K4
248	MAP3K6
249	MAP3K9
250	MAP4K1
251	MAP4K3
252	MAP4K4
253	MAPK1
254	MAPK11
255	MAPK14
256	MAPK4
257	MAPK6
258	MAPK7
259	MAPK8
260	MAST1
261	MAST2
262	MATK
263	MBD4
264	MCF2
265	MDM2
266	MED13L
267	MEF2C
268	MEFV
269	MEN1
270	MEPE
271	MERTK
272	MET
273	MINK1
274	MKNK1
275	MKNK2
276	MLL
277	MLLT3
278	MMP2
279	MRAS
280	MRE11A
281	MSH4
282	MSH6
283	MST1R
284	MSTN
285	MYB
286	MYBL2
287	MYCL1
288	MYCN
289	MYH11
290	MYH9
291	MYO3A
292	NAT6
293	NCAPD3
294	NCOA2
295	NCOA3
296	NEK1
297	NEK7
298	NEK9
299	NF1
300	NF2
301	NIPBL
302	NLK
303	NLRP1
304	NLRP3
305	NOS1AP
306	NOTCH1
307	NOTCH2
308	NOTCH3
309	NOTCH4
310	NR0B1
311	NR1H4
312	NRAS
313	NRBP1
314	NTHL1
315	NTRK1
316	NTRK2
317	NTRK3
318	NUMA1
319	NUP153
320	NUP160
321	NUP214
322	NUP54
323	NXF3
324	OCRL
325	OGG1
326	ORC6L
327	PAK3
328	PAK4
329	PAK6
330	PAK7
331	PAPPA2
332	PAXIP1
333	PC
334	PCNA
335	PDCD5
336	PDGFC
337	PDGFRA
338	PDGFRB
339	PDK1
340	PDK3
341	PDPK1
342	PGR
343	PI4K2A
344	PI4KA
345	PIGC
346	PIK3C2A
347	PIK3C2B
348	PIK3C3
349	PIK3CA
350	PIK3CD
351	PIK3CG
352	PIK3R1
353	PLCB1
354	PLCG1
355	PLCG2
356	PLEKHB1
357	PLEKHO1
358	PLXNB3
359	PPARGC1A
360	PPFIA3
361	PPP1R10
362	PPP1R15A
363	PPP1R3A
364	PPP2R1B
365	PRKACA
366	PRKACB
367	PRKCB
368	PRKCD
369	PRKCE
370	PRKCG
371	PRKCH
372	PRKCI
373	PRKCQ
374	PRKD1
375	PRKD2
376	PRKD3
377	PRKDC
378	PRKG1
379	PRKX
380	PRPF8
381	PTCH1
382	PTCH2
383	PTEN
384	PTPN11
385	PTPN9
386	PTPRD
387	PTPRG
388	PTPRM
389	PTPRN
390	PTPRO
391	PTPRT
392	RAC1
393	RAD21
394	RAF1
395	RAG1
396	RALA
397	RALB
398	RAP2B
399	RAPGEF1
400	RARA
401	RASA3
402	RASGRP3
403	RASSF2
404	RB1
405	RBL1
406	RBL2
407	RELA
408	REST
409	RET
410	RGS14
411	RGS3
412	RGS6
413	RHOB
414	RHOBTB3
415	RIF1
416	RIN1
417	RIPK1
418	RNF130
419	ROCK1
420	ROR2
421	ROS1
422	RPS6KA1
423	RPS6KA2
424	RPS6KA6
425	RPS6KC1
426	RYK
427	SATB1
428	SCYL2
429	SEMA3F
430	SERPINB2
431	SGK2
432	SHC1
433	SHC3
434	SIAH2
435	SKI
436	SLK
437	SMAD4
438	SMARCA4
439	SMARCC1
440	SMARCC2
441	SMARCD3
442	SMC2
443	SMO
444	SNX19
445	SOCS1
446	SPEN
447	SPI1
448	SPTB
449	SRC
450	STAT2
451	STAT3
452	STAT5A
453	STAT5B
454	STAT6
455	STK11
456	STK24
457	STK3
458	SYK
459	TAF1
460	TAF4B
461	TAOK3
462	TEC
463	TEK
464	TFDP1
465	TGFBR2
466	TGS1
467	TIAM1
468	TIMP3
469	TNFAIP3
470	TNFRSF9
471	TNK2
472	TNKS2
473	TOP1
474	TP53
475	TP63
476	TP73
477	TPO
478	TRAIP
479	TRIB1
480	TRIM24
481	TRIM33
482	TRIM36
483	TRPM6
484	TSC1
485	TSC2
486	TSC22D4
487	TSHR
488	TTBK2
489	TWF2
490	TYK2
491	TYRO3
492	TYRP1
493	UBE2O
494	UBR5
495	UNC5B
496	USP8
497	UVRAG
498	VAV1
499	VAV3
500	VIPR2
501	WDR44
502	WNK1
503	WT1
504	XIAP
505	XRCC1
506	YES1
507	ZAK
508	ZAP70
509	ZFYVE9
510	ZMYND10

## Sheet: breast cancer-1
3. 517 gene expression signatures of breast cancer derived from RWR. the localp and globalp value is less than 0.05
genes	localp	globalp
ABCA4	0.026	0.0200591
ABCB6	0.015	0.0409963
ABCB8	0.005	0.00801259
ABL2	0.017	0.0170909
ACADM	0.005	0.0111682
ACAP1	0.022	0.033473
ACCS	0.003	0.0103187
ACO2	0.006	0.0124369
ACY1	0.031	0.0330168
ADAM12	0	0.00254231
ADAR	0.009	0.0224711
ADRA1A	0.018	0.0243415
AFF1	0.043	0.0375159
AGAP2	0.008	0.00808133
AGER	0.024	0.0285516
AHSA2	0.02	0.047883
AKAP6	0.003	0.00340075
AKAP8	0.03	0.0336805
AKAP9	0.027	0.0185379
AKT1	0.033	0.00524277
ALK	0.011	0.0253139
ALS2CL	0.007	0.0122245
AMFR	0.04	0.026139
ANAPC5	0.014	0.0188811
ANK1	0.027	0.02326
ANK2	0.015	0.0157389
AP1M1	0.031	0.015904
APC	0.001	0.000724677
APC2	0.001	0.00229112
APCS	0.018	0.0250449
APOL1	0.028	0.0330491
ARAP3	0.004	0.00911926
ARFGAP3	0.026	0.0474269
ARFGEF2	0.012	0.00888152
ARFRP1	0.025	0.0359148
ARHGAP11A	0.008	0.0275384
ARHGAP29	0.018	0.0239168
ARHGEF4	0.007	0.00757504
ARID1B	0.034	0.0242265
ASL	0.006	0.0112992
ATF2	0.022	0.0174746
ATF7IP	0.028	0.0049803
ATM	0.006	0.00184967
ATP2A3	0.032	0.0413752
ATR	0	0.00208437
ATRN	0.038	0.0470753
BARD1	0.001	0.00233417
BAT2	0.01	0.00753398
BAZ1B	0.016	0.015932
BCAR1	0.01	0.0107316
BCCIP	0.017	0.015749
BCL11A	0.01	0.0353824
BEND7	0.048	0.0304599
BGN	0.007	0.00716118
BIRC6	0.03	0.03024
BMP1	0.014	0.0149811
BOC	0.014	0.0154415
BRAF	0	0.00165133
BRCA1	0	1.71e-05
BRCA2	0	1.62e-05
BRIP1	0.004	0.00843286
C18orf19	0.008	0.0122655
C1QB	0.037	0.0360221
C2orf44	0.017	0.0325452
C4orf14	0.014	0.0117294
C6orf204	0.009	0.0123261
CACNA1F	0.013	0.016811
CASP8	0.045	0.0149596
CAV1	0.025	0.00639615
CBFB	0.02	0.0358891
CCNT1	0.027	0.0180912
CD2	0.03	0.0276909
CDC27	0.019	0.0152994
CDC42BPB	0.029	0.0316514
CDH1	0	0.000197813
CDH10	0.006	0.00837436
CDH8	0.01	0.030435
CDKL2	0.024	0.0474325
CDKN2A	0.006	0.000939762
CDKN2C	0.015	0.0250477
CDON	0.008	0.0165424
CDS1	0.005	0.0363113
CFHR5	0.019	0.0428469
CFL2	0.02	0.0368778
CFP	0.005	0.011125
CHEK2	0.014	0.01324
CHRND	0.022	0.0289248
CIC	0.018	0.0075332
CLCA2	0.02	0.0205163
CLIP1	0.016	0.0315192
CLSPN	0.007	0.0159431
CNGA2	0.005	0.0119749
CNNM4	0.005	0.00337887
CNTN6	0.005	0.0101691
COG3	0.036	0.0191098
COL11A1	0	0.0035483
COL7A1	0.002	0.00219825
CPSF3	0.039	0.0218405
CRX	0.038	0.020672
CRYAA	0.042	0.0282115
CSNK1A1	0.018	0.0168097
CSNK1D	0.013	0.0142337
CST4	0.039	0.0415002
CTCF	0.028	0.0247939
CTNNA1	0.004	0.00193195
CTNNB1	0.004	0.000553251
CUBN	0.002	0.00291546
CUTC	0.019	0.027764
CUX1	0.039	0.0282654
CXCR5	0.049	0.0314343
CYP1A1	0.012	0.0083662
DAZAP1	0.041	0.033099
DBN1	0.006	0.0051966
DDO	0.037	0.0386455
DDX10	0.012	0.0374888
DDX18	0.02	0.0402679
DDX3X	0.034	0.0194022
DGKB	0.046	0.0165662
DGKE	0.047	0.0370662
DGKG	0.017	0.0463802
DKK3	0.036	0.0465127
DMD	0.008	0.00600477
DNAH9	0.002	0.00463536
DNAJA3	0.024	0.0181193
DTX3L	0.042	0.0287919
DVL3	0.032	0.0180618
DYRK2	0.022	0.0374947
DYSF	0.011	0.00954587
ECT2	0.011	0.0234409
EDNRA	0.017	0.0206497
EGFL6	0.039	0.0452929
EHBP1	0.044	0.0363777
EHMT1	0.002	0.00851202
EIF3M	0.015	0.0206417
EIF4A2	0.035	0.0162074
EIF5	0.032	0.0275085
EP300	0.011	0.001071
EPHA1	0.014	0.0340844
EPHA6	0.012	0.0266281
EPHA8	0.015	0.0235712
ERBB2	0.003	0.00150126
ERCC3	0.024	0.0188533
ERCC6	0	0.00166348
EREG	0.025	0.0455404
ESR1	0.012	0.00105894
FAAH	0.034	0.0451751
FABP4	0.007	0.0180569
FAM107B	0.024	0.0438244
FAM131A	0.035	0.0421801
FAM83F	0.03	0.0451751
FBXO8	0.029	0.0464221
FBXW7	0.011	0.00672832
FCRL3	0.025	0.043903
FEM1C	0.01	0.010805
FGFR1	0.025	0.0163958
FGFR2	0.034	0.0226334
FGFR4	0.023	0.0229718
FIGF	0.008	0.0203722
FLNB	0.002	0.00157148
FN1	0.003	0.00117403
FOXP2	0.011	0.0140486
FOXP4	0.014	0.0140056
FUS	0.033	0.0171634
FXR1	0.033	0.0301049
FYN	0.037	0.00117967
G3BP2	0.008	0.00532558
G6PC	0.019	0.0432253
GAB1	0.001	0.00557955
GABRA4	0.034	0.0276094
GALNT5	0.004	0.00994992
GATA3	0.042	0.0338642
GGA1	0.006	0.00518792
GGA3	0.018	0.0230923
GJB1	0.015	0.030012
GLI1	0.002	0.00236186
GNB1L	0.02	0.0400428
GNPAT	0.019	0.0184475
GOLGB1	0.008	0.00704817
GP5	0.02	0.0271374
GPC1	0.021	0.0242125
GPNMB	0.006	0.0129328
GPR45	0.014	0.0411421
GRIK2	0.013	0.0194798
GRIK3	0.012	0.0346223
GRIN2A	0.016	0.017161
GRIN2D	0.002	0.00160368
GRK6	0.014	0.0179338
GSN	0.001	0.00191381
GTF2A1	0.017	0.0177139
HADHB	0.025	0.036214
HDAC4	0.024	0.0141381
HDAC7	0.009	0.018547
HDLBP	0.003	0.00582597
HIST1H4A	0.013	0.0158646
HIST1H4B	0.017	0.0160617
HIST1H4C	0.009	0.0160617
HIST1H4D	0.009	0.0160617
HIST1H4E	0.012	0.0160617
HIST1H4F	0.02	0.0159791
HIST1H4H	0.013	0.0160617
HIST1H4I	0.02	0.0160617
HIST1H4J	0.021	0.0160617
HIST1H4K	0.018	0.0160617
HIST1H4L	0.015	0.0160617
HIST2H2AB	0.021	0.0332658
HIST2H4A	0.012	0.0155208
HIST2H4B	0.012	0.0160617
HIST4H4	0.015	0.0151003
HK3	0.024	0.0216922
HM13	0.027	0.0363922
HNF1A	0.013	0.00686503
HOOK1	0.012	0.0155674
HOOK3	0.018	0.0187508
HOXA3	0.003	0.0116768
HRAS	0.007	0.00355915
HSD11B1	0.029	0.0408444
HSPA14	0.023	0.0165991
HSPA4	0.039	0.0153727
HTATSF1	0.021	0.0304372
ICAM5	0.004	0.00408723
IFNA2	0.026	0.0362758
IFNB1	0.019	0.0309701
IKBKB	0.027	0.0144323
INA	0.016	0.0304394
INHBE	0.008	0.00847123
IRAK1	0.027	0.0169904
IRF8	0.008	0.00998681
IRS4	0.014	0.0180752
ITGA9	0.002	0.00501484
JAK3	0.024	0.0188717
KALRN	0.025	0.0235354
KCNA5	0.021	0.0347632
KCNIP3	0.009	0.0096154
KCNJ1	0.015	0.0292984
KCNJ15	0.023	0.0280832
KEAP1	0.015	0.00650551
KIAA1012	0.015	0.0286045
KIAA1632	0.002	0.00449935
KIF6	0.037	0.0417887
KPNA5	0.006	0.0115945
KRAS	0	0.00108593
KTN1	0.006	0.0107137
LAMA2	0.027	0.0322816
LGALS2	0.02	0.0397242
LHCGR	0.041	0.0267701
LIPE	0.02	0.0174898
LNPEP	0.036	0.0358327
LONRF3	0.026	0.0459108
LRBA	0.004	0.00370437
LRRC41	0.031	0.0372682
LRRC7	0.025	0.0302282
LRRFIP1	0.028	0.0366249
LYN	0.047	0.0141911
LZTS2	0.021	0.0246503
MACF1	0.002	0.00207039
MAD1L1	0.009	0.0076147
MAGEA1	0.019	0.0231927
MAGEA4	0.014	0.0136227
MAGED2	0.049	0.0431163
MAGEE1	0.008	0.0108872
MAGOHB	0.036	0.0353067
MAOA	0.02	0.0464106
MAP2K4	0.008	0.00601493
MAP3K12	0.029	0.0265127
MAP3K6	0.006	0.0126325
MAPK13	0.025	0.0139368
MAST2	0.011	0.0158164
MCF2L2	0.038	0.041528
MCOLN1	0.026	0.0293272
MDC1	0.015	0.015693
MED14	0.041	0.0202674
MFAP5	0.023	0.0278908
MICAL1	0.016	0.0332695
MICALL1	0.035	0.0435907
MMP10	0.035	0.032265
MMP15	0.039	0.0399623
MMP8	0.018	0.0255259
MRE11A	0.002	0.00566426
MSH2	0.016	0.0144674
MSH6	0	0.00207456
MSI1	0.031	0.043626
MTMR3	0.045	0.0389134
MTMR8	0.006	0.00783856
MYH1	0.001	0.00322741
MYH9	0.01	0.00554865
MYOD1	0.016	0.00647114
MYST4	0.027	0.0400661
N4BP2	0.017	0.029703
NBN	0.011	0.0147176
NCOA6	0.008	0.00509062
NDUFA8	0.017	0.0470403
NEDD4	0.019	0.0137586
NET1	0.015	0.0267798
NF1	0.009	0.0265021
NF2	0.003	0.00200877
NFYC	0.029	0.0322154
NID2	0.023	0.0278339
NIP7	0.03	0.0273176
NIPBL	0.019	0.0157037
NLE1	0.043	0.0473257
NLRP1	0.022	0.0275652
NOS2	0.008	0.0315495
NOTCH1	0.018	0.0144615
NOTCH2	0.038	0.0201467
NOVA1	0.026	0.0465141
NPBWR1	0.04	0.0407976
NPR1	0.019	0.0282486
NRAS	0.006	0.00565706
NRCAM	0.003	0.00588734
NTRK3	0.021	0.0268601
NUAK2	0.023	0.0371779
NUP133	0.001	0.00297223
NUP214	0.003	0.00287787
NUP98	0.008	0.00660863
NXN	0.027	0.0383791
OLA1	0.014	0.0209514
OR1N1	0.038	0.048165
OSBPL11	0.04	0.0356305
OSTC	0.028	0.0478715
OTC	0.027	0.0392972
OTOF	0.001	0.00366739
PANX2	0.021	0.0477471
PARP1	0.011	0.0135092
PAXIP1	0.028	0.0229459
PCDH8	0.035	0.0465127
PDCD4	0.024	0.0403071
PDCD6	0.035	0.021479
PDE2A	0.017	0.0343839
PDGFRB	0.012	0.0112903
PDLIM7	0.047	0.0246143
PDZD4	0.026	0.0460313
PER1	0.004	0.00524494
PER2	0.015	0.0144574
PHB	0.006	0.00708619
PHC1	0.026	0.0327783
PHKB	0.004	0.00704357
PIGS	0.045	0.0317714
PIK3CA	0.001	0.000192518
PIK3R4	0.032	0.0354796
PKN1	0.036	0.0213917
PLA2G4A	0.045	0.0243088
PLCB1	0.012	0.0217805
PLCG1	0.005	0.00128131
PLD2	0.026	0.0200948
PLEKHA8	0.016	0.037513
PLOD1	0.031	0.045431
PLS3	0.012	0.0109179
PLXNB1	0.026	0.0222262
POLH	0.026	0.033022
POLR2F	0.031	0.0198783
POP1	0.03	0.0263254
POU2F1	0.017	0.0166992
PPA1	0.014	0.0254513
PPFIBP2	0.017	0.0299043
PPHLN1	0.02	0.027703
PPM1E	0.013	0.0123414
PPM1F	0.024	0.0209936
PPP1R12A	0.012	0.0246746
PPP1R3A	0.017	0.0311864
PRDX5	0.016	0.0367749
PRICKLE3	0.015	0.0381063
PRKAA1	0.023	0.0189788
PRKAA2	0.006	0.00819642
PRPF4B	0.027	0.0333251
PRPS1	0.003	0.00968475
PSME4	0.015	0.0470403
PTCH1	0.009	0.0072972
PTEN	0	0.000584411
PTHLH	0.029	0.0354781
PTP4A2	0.041	0.0488539
PTPN12	0.034	0.015457
PTPN14	0.006	0.00685279
PTPRC	0	0.00150707
PTRF	0.033	0.028595
RAC2	0.011	0.00537896
RAD51	0.011	0.00237905
RAD54L	0.017	0.0370705
RAGE	0.016	0.0365625
RAI2	0.032	0.0295723
RANBP1	0.03	0.0295471
RAP1GAP	0.004	0.00756262
RAPH1	0.009	0.0109764
RARG	0.028	0.0292719
RASAL2	0.025	0.0333469
RASGRF2	0.004	0.00645638
RB1	0.012	0.00173813
RB1CC1	0.025	0.0306647
RFC4	0.027	0.027264
RFX2	0.008	0.00825866
RGL1	0.004	0.0102666
RIF1	0.016	0.00376912
RNF113A	0.033	0.0462429
RNF152	0.031	0.0452258
RNF20	0.022	0.0283481
RNF216	0.036	0.0333852
ROCK1	0.014	0.0177787
ROR1	0.036	0.0296851
RPL3	0.011	0.0176713
RPRD1A	0.038	0.0470157
RPS6KA3	0.02	0.0211792
RPS6KA4	0.021	0.0345464
RPS6KC1	0.042	0.0348698
RPS9	0.039	0.015592
RRP9	0.003	0.0119441
RUFY1	0.024	0.0378943
SCARF2	0.018	0.0293711
SCNN1B	0.012	0.00743547
SCP2	0.02	0.0188237
SEMA3A	0.029	0.0307932
SEMA4G	0.031	0.0453914
SERPINE2	0.03	0.0354726
SFRS1	0.023	0.016973
SFRS16	0.034	0.030239
SGK3	0.027	0.0363733
SH2D3A	0.015	0.0369578
SHROOM2	0.019	0.0392088
SIPA1L1	0.033	0.0388696
SIX4	0.007	0.00281746
SLAMF1	0.028	0.0304258
SLC22A9	0.005	0.0101773
SLC35A2	0.037	0.04584
SLC6A3	0.008	0.0111245
SLC6A5	0.022	0.0417461
SLC7A7	0.043	0.0411292
SLC8A3	0.042	0.0415393
SLC9A2	0.006	0.00908437
SLC9A3R1	0.041	0.0158123
SMARCA4	0.006	0.00409947
SMC2	0.043	0.0274828
SNRK	0.019	0.0407295
SORBS1	0.026	0.0253183
SORCS1	0.022	0.0417979
SORL1	0.003	0.00840604
SP110	0.004	0.00804861
SPAG6	0.038	0.0165109
SPAST	0.014	0.0176919
SPEN	0.009	0.00805677
SPTAN1	0.001	0.00107048
SREBF2	0.008	0.00824052
SRGAP3	0.012	0.0247087
SSNA1	0.034	0.0354684
STARD8	0.002	0.00911926
STAT1	0.032	0.0142462
STAT4	0.036	0.0294265
STK36	0.009	0.0140868
STK39	0.046	0.037475
STRBP	0.038	0.0407198
STX12	0.044	0.0288477
STX5	0.031	0.0212337
SUMO4	0.024	0.0136091
SUV39H2	0.023	0.025508
SYNE2	0.009	0.0113305
SYT3	0.044	0.0372528
TACC2	0.007	0.00869482
TAF1L	0.023	0.042105
TAX1BP1	0.032	0.037037
TBK1	0.032	0.0170954
TCF7L1	0.012	0.0427493
TCP1	0.042	0.0172913
TEK	0.016	0.0167336
TEKT4	0.014	0.0172848
TESK1	0.024	0.0216612
TESK2	0.031	0.0394067
TGFBR2	0	0.00153754
TGS1	0.035	0.0253413
THBS3	0.018	0.0352339
THOC5	0.009	0.0100772
TICAM1	0.017	0.0188901
TIMELESS	0.005	0.00513167
TLL1	0.013	0.0302782
TMED1	0.017	0.0341417
TMEM161A	0.005	0.0109627
TMPRSS6	0	0.00420875
TNFRSF25	0.041	0.0278925
TNS1	0.018	0.0349902
TOP1	0.026	0.0167162
TOR1AIP1	0.023	0.0420948
TP53	0.001	9.58e-05
TP53I3	0.048	0.0400391
TPM4	0.047	0.0340134
TRAF2	0.041	0.00321899
TREM1	0.043	0.0391927
TREML1	0.035	0.0462313
TRIM25	0.046	0.0333033
TRIM29	0.026	0.0153706
TRIO	0.014	0.0242028
TRIP11	0.028	0.0398731
TRPC4	0.03	0.0281376
TRPM7	0.023	0.0203816
TSC22D4	0.036	0.0181761
TSN	0.044	0.0385766
TSPAN4	0.032	0.0300355
TTC15	0.018	0.0286045
TTC3	0.01	0.0407586
UBR4	0.04	0.0377153
USP54	0.041	0.0288538
UTP20	0.009	0.00694063
VAV3	0.016	0.0202166
VEPH1	0.041	0.0404689
VPS72	0.046	0.0278718
VWF	0.018	0.0171016
WARS	0.041	0.0257438
WBP4	0.037	0.0221039
WNK1	0	0.00255846
XBP1	0.008	0.012354
XDH	0.007	0.00645881
XIRP1	0	0.00190261
ZBTB3	0.008	0.0127131
ZCCHC14	0.029	0.033262
ZDHHC4	0.019	0.0468926
ZFP64	0.007	0.0107115
ZIC3	0.017	0.0344134
ZMIZ1	0.025	0.0301064
ZNF277	0.005	0.0055437
ZNF281	0.012	0.0373297
ZNF646	0.028	0.0418185
ZNHIT2	0.031	0.0474753

## Sheet: breast cancer-2
4. the 435 genes signatures of breast cancer was used to build the model.
1	ABCA4
2	ABCB6
3	ABCB8
4	ABL2
5	ACADM
6	ACAP1
7	ACO2
8	ACY1
9	ADAM12
10	ADAR
11	ADRA1A
12	AFF1
13	AGAP2
14	AGER
15	AKAP6
16	AKAP8
17	AKAP9
18	AKT1
19	ALK
20	ALS2CL
21	AMFR
22	ANAPC5
23	ANK1
24	ANK2
25	APC
26	APC2
27	APCS
28	APOL1
29	ARAP3
30	ARFGAP3
31	ARFGEF2
32	ARHGAP11A
33	ARHGAP29
34	ARHGEF4
35	ASL
36	ATF2
37	ATF7IP
38	ATM
39	ATP2A3
40	ATR
41	ATRN
42	BARD1
43	BAT2
44	BAZ1B
45	BCCIP
46	BCL11A
47	BGN
48	BMP1
49	BRCA1
50	BRCA2
51	BRIP1
52	C1QB
53	C2orf44
54	CACNA1F
55	CASP8
56	CAV1
57	CBFB
58	CCNT1
59	CD2
60	CDC27
61	CDC42BPB
62	CDH1
63	CDH10
64	CDH8
65	CDKL2
66	CDKN2A
67	CDKN2C
68	CDON
69	CDS1
70	CFHR5
71	CFP
72	CHEK2
73	CHRND
74	CIC
75	CLCA2
76	CLIP1
77	CLSPN
78	CNNM4
79	CNTN6
80	COL11A1
81	COL7A1
82	CRX
83	CRYAA
84	CSNK1A1
85	CSNK1D
86	CST4
87	CTCF
88	CTNNA1
89	CTNNB1
90	CUBN
91	CUTC
92	CUX1
93	CXCR5
94	CYP1A1
95	DAZAP1
96	DBN1
97	DDO
98	DDX10
99	DDX18
100	DDX3X
101	DGKB
102	DGKE
103	DGKG
104	DKK3
105	DMD
106	DNAH9
107	DNAJA3
108	DVL3
109	DYRK2
110	DYSF
111	ECT2
112	EDNRA
113	EGFL6
114	EHBP1
115	EHMT1
116	EIF3M
117	EIF4A2
118	EIF5
119	EP300
120	EPHA1
121	ERBB2
122	ERCC3
123	ERCC6
124	EREG
125	ESR1
126	FAAH
127	FABP4
128	FAM131A
129	FBXW7
130	FEM1C
131	FGFR1
132	FGFR2
133	FGFR4
134	FIGF
135	FLNB
136	FN1
137	FUS
138	FXR1
139	FYN
140	G3BP2
141	G6PC
142	GAB1
143	GABRA4
144	GATA3
145	GGA1
146	GGA3
147	GJB1
148	GLI1
149	GNB1L
150	GNPAT
151	GOLGB1
152	GP5
153	GPC1
154	GPNMB
155	GPR45
156	GRIK2
157	GRIK3
158	GRIN2A
159	GRIN2D
160	GRK6
161	GSN
162	GTF2A1
163	HADHB
164	HDAC4
165	HDAC7
166	HDLBP
167	HIST1H4J
168	HIST1H4L
169	HK3
170	HNF1A
171	HOOK1
172	HOXA3
173	HRAS
174	HSD11B1
175	HSPA14
176	HSPA4
177	HTATSF1
178	ICAM5
179	IFNA2
180	IFNB1
181	IKBKB
182	INA
183	INHBE
184	IRAK1
185	IRF8
186	IRS4
187	ITGA9
188	JAK3
189	KALRN
190	KCNA5
191	KCNJ1
192	KCNJ15
193	KEAP1
194	KIAA1012
195	KPNA5
196	KRAS
197	KTN1
198	LAMA2
199	LGALS2
200	LHCGR
201	LIPE
202	LNPEP
203	LONRF3
204	LRBA
205	LRRC41
206	LRRFIP1
207	LYN
208	MACF1
209	MAD1L1
210	MAGEA1
211	MAGEA4
212	MAGED2
213	MAGOHB
214	MAOA
215	MAP2K4
216	MAP3K12
217	MAP3K6
218	MAPK13
219	MAST2
220	MCF2L2
221	MCOLN1
222	MDC1
223	MED14
224	MFAP5
225	MICAL1
226	MICALL1
227	MMP10
228	MMP15
229	MMP8
230	MRE11A
231	MSH2
232	MSH6
233	MSI1
234	MTMR3
235	MTMR8
236	MYH1
237	MYH9
238	MYOD1
239	MYST4
240	NBN
241	NCOA6
242	NDUFA8
243	NEDD4
244	NET1
245	NF1
246	NF2
247	NFYC
248	NID2
249	NIP7
250	NIPBL
251	NLE1
252	NLRP1
253	NOS2
254	NOTCH1
255	NOTCH2
256	NOVA1
257	NPR1
258	NRAS
259	NRCAM
260	NTRK3
261	NUP133
262	NUP214
263	NUP98
264	NXN
265	OLA1
266	OSBPL11
267	OTC
268	OTOF
269	PARP1
270	PAXIP1
271	PCDH8
272	PDCD4
273	PDCD6
274	PDE2A
275	PDGFRB
276	PDLIM7
277	PER1
278	PER2
279	PHB
280	PHKB
281	PIK3CA
282	PIK3R4
283	PKN1
284	PLA2G4A
285	PLCB1
286	PLCG1
287	PLD2
288	PLOD1
289	PLS3
290	PLXNB1
291	POLH
292	POLR2F
293	POP1
294	POU2F1
295	PPA1
296	PPFIBP2
297	PPM1E
298	PPM1F
299	PPP1R12A
300	PPP1R3A
301	PRICKLE3
302	PRKAA1
303	PRKAA2
304	PRPF4B
305	PRPS1
306	PSME4
307	PTCH1
308	PTEN
309	PTHLH
310	PTP4A2
311	PTPN12
312	PTPN14
313	PTPRC
314	PTRF
315	RAC2
316	RAD51
317	RAD54L
318	RAGE
319	RAI2
320	RANBP1
321	RAP1GAP
322	RARG
323	RASAL2
324	RB1
325	RB1CC1
326	RFC4
327	RFX2
328	RGL1
329	RIF1
330	RNF113A
331	RNF216
332	ROCK1
333	ROR1
334	RPL3
335	RPRD1A
336	RPS6KA3
337	RPS6KA4
338	RPS6KC1
339	RPS9
340	RRP9
341	RUFY1
342	SCNN1B
343	SCP2
344	SEMA3A
345	SEMA4G
346	SERPINE2
347	SFRS16
348	SH2D3A
349	SHROOM2
350	SIPA1L1
351	SLAMF1
352	SLC35A2
353	SLC6A3
354	SLC6A5
355	SLC7A7
356	SLC9A2
357	SLC9A3R1
358	SMARCA4
359	SMC2
360	SNRK
361	SORBS1
362	SORL1
363	SP110
364	SPAG6
365	SPAST
366	SPEN
367	SPTAN1
368	SREBF2
369	SRGAP3
370	SSNA1
371	STARD8
372	STAT1
373	STAT4
374	STK39
375	STX12
376	STX5
377	SUV39H2
378	SYNE2
379	TACC2
380	TAX1BP1
381	TBK1
382	TCF7L1
383	TCP1
384	TEK
385	TESK1
386	TESK2
387	TGFBR2
388	TGS1
389	THBS3
390	THOC5
391	TICAM1
392	TIMELESS
393	TLL1
394	TMED1
395	TMEM161A
396	TMPRSS6
397	TNFRSF25
398	TNS1
399	TOP1
400	TOR1AIP1
401	TP53
402	TP53I3
403	TPM4
404	TRAF2
405	TREM1
406	TRIM25
407	TRIM29
408	TRIO
409	TRIP11
410	TRPC4
411	TSC22D4
412	TSN
413	TSPAN4
414	TTC15
415	TTC3
416	UBR4
417	UTP20
418	VAV3
419	VPS72
420	VWF
421	WARS
422	WBP4
423	WNK1
424	XBP1
425	XDH
426	ZBTB3
427	ZCCHC14
428	ZDHHC4
429	ZFP64
430	ZIC3
431	ZMIZ1
432	ZNF277
433	ZNF281
434	ZNF646
435	ZNHIT2
